# Supplementary material for: The Pro-Inflammatory Chemokines CXCL9, CXCL10 and CXCL11 Are Upregulated Following SARS-CoV-2 Infection in an AKT-Dependent Manner
Source: MDPI journal article supplement (doi:10.3390/v13061062), 2021-06-03
Supplement: s1 [file s1]

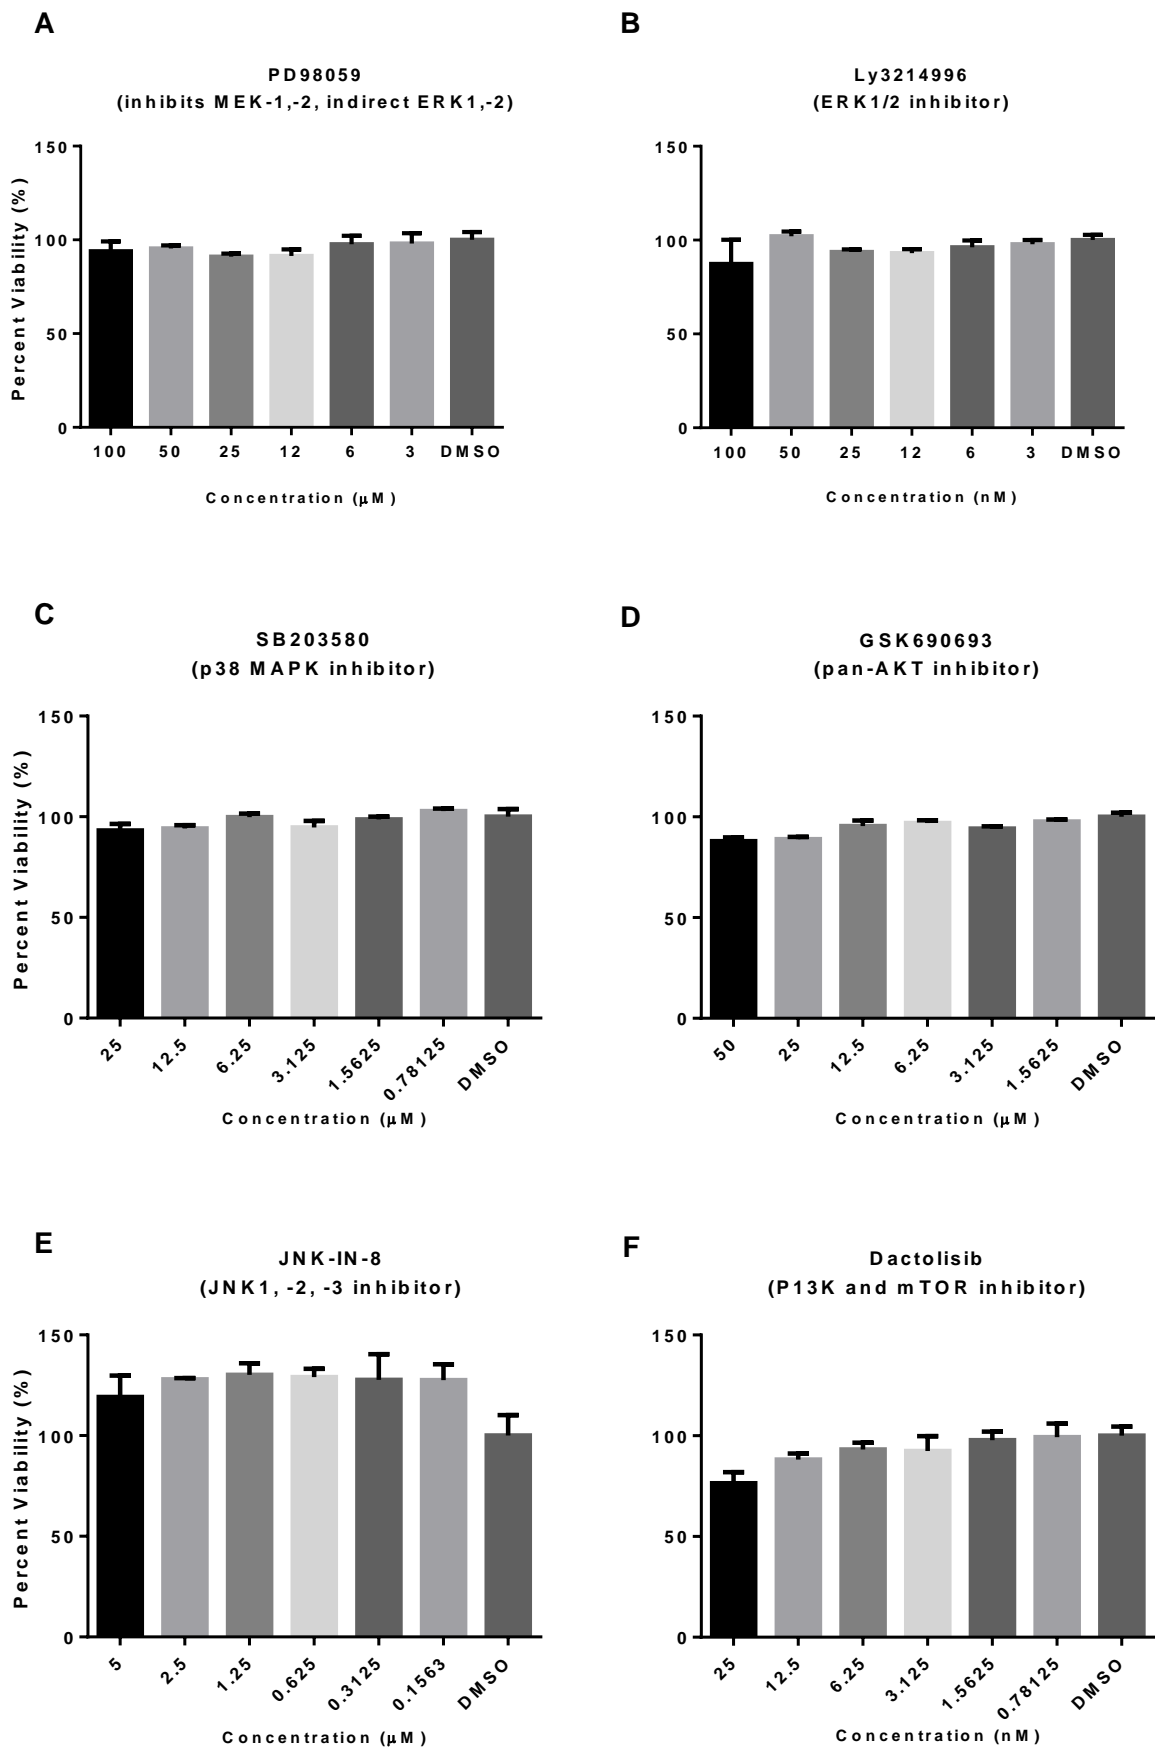

**Figure S1.** Cytotoxicity of kinase inhibitors in Calu-3 cells. Calu-3 cells were exposed to the indicated kinase inhibitors, over a range of concentrations. Percent cellular viability was determined at 24 h post-treatment using CellTiter Glo. The percent viability (relative luminescence units; RLU) of treated cells, and those exposed to vehicle (DMSO) alone, were normalized to untreated cells. Data represent the mean  $\pm$  SEM (n=3).
